# Supplementary material for: Exploring crosslinker effects on fluorescent molecularly imprinted polymers for improved gefitinib delivery in lung cancer theranostics
Source: Royal Society of Chemistry journal article supplement (doi:10.1039/d4ma00391h), 2024-01-01
Supplement: d4ma00391h1.pdf [file d4ma00391h1.pdf]

## Supporting Information

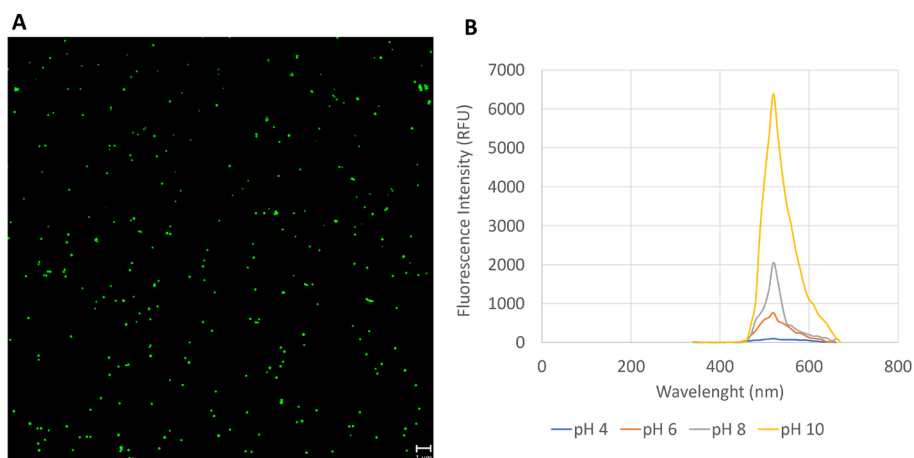

**Figure S1.** (A) Fluorescence microscopy image (magnification 40x) of GEF imprinted particles and (B) fluorescence emission spectra of MIP<sub>1</sub> as a function of the media pH

**Table S1.** Hydrodynamic mean diameter, polydispersity index, and  $\xi$ -Potential of imprinted and non-imprinted particles

| Matrix           | Mean Diameter, nm | Polydispersity Index (PI) | $\xi$ -Potential (mV) |
|------------------|-------------------|---------------------------|-----------------------|
| MIP <sub>1</sub> | 269.4 ± 72.9      | 0.039                     | -30.5 ± 0.6           |
| NIP <sub>1</sub> | 221.4 ± 66.0      | 0.170                     | -27.9 ± 0.9           |
| MIP <sub>2</sub> | 717.6 ± 39.7      | 0.614                     | -26.0 ± 0.3           |
| NIP <sub>2</sub> | 717.4 ± 12.3      | 0.748                     | -21.8 ± 0.8           |
| MIP <sub>3</sub> | 369.6 ± 80.3      | 0.196                     | -26.9 ± 0.6           |
| NIP <sub>3</sub> | 556.1 ± 97.4      | 0.197                     | -24.5 ± 0.4           |

**Table S2.** Determination of BSA binding capacity of MIPs and NIPs prepared in PBS buffer (10<sup>-3</sup> M, pH 7.4)

| Polymer          | EGDMA   | TRIM    | Bound BSA (%) |
|------------------|---------|---------|---------------|
| MIP <sub>1</sub> | 10 mmol | /       | 32.7 ± 0.4    |
| NIP <sub>1</sub> | 10 mmol | /       | 35.6 ± 0.7    |
| MIP <sub>2</sub> | /       | 10 mmol | 33.8 ± 1.6    |
| NIP <sub>2</sub> | /       | 10 mmol | 34.4 ± 1.4    |
| MIP <sub>3</sub> | 5 mmol  | 5 mmol  | 36.3 ± 1.2    |
| NIP <sub>3</sub> | 5 mmol  | 5 mmol  | 34.4 ± 1.9    |

**Table S3.** Percentages of bound GEF and VAN by imprinted (MIP<sub>1</sub>) and non-imprinted (NIP<sub>1</sub>) particles and  $\alpha/\epsilon$  values for different

| C <sub>i</sub> (mol/L) | Bound GEF (%)    |                  | Bound VAN (%)    |                  | $\alpha_{\text{GEF}}$ | $\alpha_{\text{VAN}}$ | $\epsilon$ |
|------------------------|------------------|------------------|------------------|------------------|-----------------------|-----------------------|------------|
|                        | MIP <sub>1</sub> | NIP <sub>1</sub> | MIP <sub>1</sub> | NIP <sub>1</sub> |                       |                       |            |
| 4.0·10 <sup>-5</sup>   | 87.5 ± 0.4       | 48.0 ± 1.1       | 48.6 ± 1.1       | 34.8 ± 0.5       | 1.82                  | 1.40                  | 1.80       |
| 7.5·10 <sup>-5</sup>   | 86.8 ± 0.7       | 10.2 ± 0.5       | 24.3 ± 0.4       | 12.9 ± 0.8       | 8.51                  | 1.88                  | 3.57       |
| 1.5·10 <sup>-4</sup>   | 59.8 ± 1.2       | 7.1 ± 0.8        | 10.7 ± 0.7       | 8.7 ± 0.6        | 8.42                  | 1.23                  | 5.59       |
| 2.5·10 <sup>-4</sup>   | 61.8 ± 0.9       | 12.9 ± 0.4       | 12.9 ± 1.0       | 10.3 ± 1.0       | 4.79                  | 1.25                  | 4.79       |
| 3.0·10 <sup>-4</sup>   | 60.5 ± 1.0       | 20.9 ± 0.9       | 16.5 ± 0.6       | 13.9 ± 0.6       | 2.89                  | 1.19                  | 3.67       |
| 3.5·10 <sup>-4</sup>   | 63.0 ± 0.7       | 30.0 ± 0.7       | 15.3 ± 0.9       | 12.9 ± 0.7       | 2.10                  | 1.19                  | 4.12       |
| 4.0·10 <sup>-4</sup>   | 46.5 ± 0.5       | 23.4 ± 0.7       | 17.7 ± 0.9       | 15.3 ± 0.6       | 1.99                  | 1.16                  | 2.63       |
| 4.5·10 <sup>-4</sup>   | 53.7 ± 0.9       | 25.7 ± 0.8       | 19.0 ± 0.8       | 17.3 ± 0.9       | 2.09                  | 1.10                  | 2.83       |
| 5.0·10 <sup>-4</sup>   | 46.4 ± 1.1       | 23.0 ± 0.5       | 17.6 ± 0.5       | 19.8 ± 0.8       | 2.02                  | 0.89                  | 2.64       |
| 6.0·10 <sup>-4</sup>   | 43.5 ± 1.1       | 18.7 ± 0.9       | 16.2 ± 0.6       | 18.3 ± 0.7       | 2.33                  | 0.89                  | 2.69       |

**Table S4.** Parameters of GEF adsorption by obtained MIPs and NIPs.

| Polymer          | Langmuir model |                         |                | Freundlich model |                         |                |
|------------------|----------------|-------------------------|----------------|------------------|-------------------------|----------------|
|                  | K <sub>L</sub> | Q <sub>max</sub>        | R <sup>2</sup> | m                | K <sub>F</sub>          | R <sup>2</sup> |
| MIP <sub>1</sub> | 12,4           | 5,98 x 10 <sup>-5</sup> | 0,94           | 0,44             | 1,43 x 10 <sup>-3</sup> | 0,96           |
| NIP <sub>1</sub> | 9,0            | 9,94 x 10 <sup>-6</sup> | 0,19           | 0,81             | 6,10 x 10 <sup>-3</sup> | 0,58           |
| MIP <sub>2</sub> | 4,1            | 4,99 x 10 <sup>-5</sup> | 0,88           | 0,61             | 3,67 x 10 <sup>-3</sup> | 0,95           |
| NIP <sub>2</sub> | 0,3            | 5,22 x 10 <sup>-5</sup> | 0,73           | 0,99             | 1,64 x 10 <sup>-2</sup> | 0,83           |
| MIP <sub>3</sub> | 18,5           | 3,77 x 10 <sup>-5</sup> | 0,74           | 0,37             | 6,04 x 10 <sup>-4</sup> | 0,88           |
| NIP <sub>3</sub> | 4,6            | 1,06 x 10 <sup>-5</sup> | 0,31           | 0,60             | 7,84 x 10 <sup>-4</sup> | 0,60           |

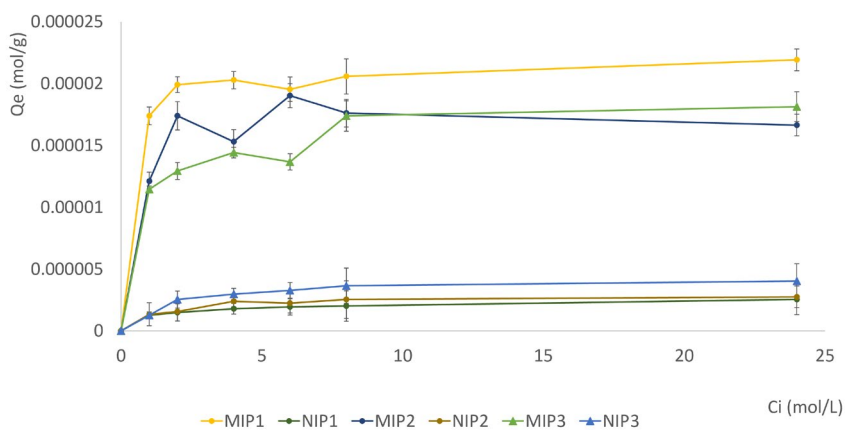

**Figure S2.** GEF adsorption kinetic curves for MIPs and NIPs.

**Table S5.** Kinetic fitting data for MIPs and NIPs.

| Polymer          | $Q_e$ (exp)           | Pseudo-first order |                       |       | Pseudo-second order   |                       |       |
|------------------|-----------------------|--------------------|-----------------------|-------|-----------------------|-----------------------|-------|
|                  |                       | $K_1$              | $Q_e^{43}$            | $R^2$ | $K_2$                 | $Q_e^{43}$            | $R^2$ |
| MIP <sub>1</sub> | $2.19 \times 10^{-5}$ | 0.17               | $4.41 \times 10^{-6}$ | 0.95  | $1.29 \times 10^{-5}$ | $2.25 \times 10^{-5}$ | 0.99  |
| NIP <sub>1</sub> | $2.59 \times 10^{-5}$ | 0.12               | $1.44 \times 10^{-6}$ | 0.98  | $1.96 \times 10^{-5}$ | $2.69 \times 10^{-6}$ | 0.99  |
| MIP <sub>2</sub> | $1.70 \times 10^{-5}$ | 0.10               | $3.60 \times 10^{-6}$ | 0.80  | $1.34 \times 10^{-6}$ | $1.67 \times 10^{-5}$ | 0.99  |
| NIP <sub>2</sub> | $2.74 \times 10^{-5}$ | 0.28               | $2.32 \times 10^{-6}$ | 0.92  | $2.54 \times 10^{-5}$ | $2.90 \times 10^{-6}$ | 0.99  |
| MIP <sub>3</sub> | $1.81 \times 10^{-5}$ | 0.35               | $1.43 \times 10^{-5}$ | 0.97  | $4.66 \times 10^{-4}$ | $1.89 \times 10^{-5}$ | 0.99  |
| NIP <sub>3</sub> | $3.63 \times 10^{-6}$ | 0.29               | $1.14 \times 10^{-6}$ | 0.64  | $1.99 \times 10^{-5}$ | $3.86 \times 10^{-6}$ | 0.99  |

**Table S6.** Linear fitting of cumulative drug diffusion curves.

| Polymer | Zero-Order Kinetic Model |        | First-Order Kinetic Model |         | Higuchi Kinetic Model |        | Ritger-Peppas Kinetic Model |        |        |
|---------|--------------------------|--------|---------------------------|---------|-----------------------|--------|-----------------------------|--------|--------|
|         | $R^2$                    | $K_0$  | $R^2$                     | $K_1$   | $R^2$                 | $K_H$  | $R^2$                       | $K_p$  | $n$    |
| MIP     | 0.7173                   | 0.0063 | 0.8228                    | -0.0124 | 0.8486                | 0.0650 | 0.9485                      | 0.1260 | 0.7599 |
| NIP     | 0.6643                   | 0.0079 | 0.8979                    | -0.0386 | 0.8080                | 0.0822 | 0.9857                      | 0.2784 | 0.6305 |
